# Supplementary material
Source: publisher figshare collection journal article supplement (https://tandf.figshare.com/ndownloader/files/15008477)
Supplement: Supplementary file 1 [file 15008477]

In Vitro Examination of Poly(glycerol sebacate) Degradation Kinetics: Effects of Porosity and Cure Temperature

Nadia M. Krook<sup>1</sup>, Israd H. Jaafar<sup>2</sup>, Tooba Sarkhosh<sup>1</sup>, Courtney LeBlon<sup>2</sup>, John P. Coulter<sup>2</sup>, Sabrina S. Jedlicka<sup>1,3,4</sup>

<sup>1</sup>Department of Materials Science & Engineering, Whitaker Laboratory, Lehigh University, Bethlehem, PA, 18015

<sup>2</sup>Department of Mechanical Engineering and Mechanics, Packard Laboratory, Lehigh University, Bethlehem, PA, 18015

<sup>3</sup>Bioengineering Program, Lehigh University, Bethlehem, PA, 18015

Correspondence to: Sabrina S. Jedlicka (E-mail: [ssj207@lehigh.edu](mailto:ssj207@lehigh.edu))

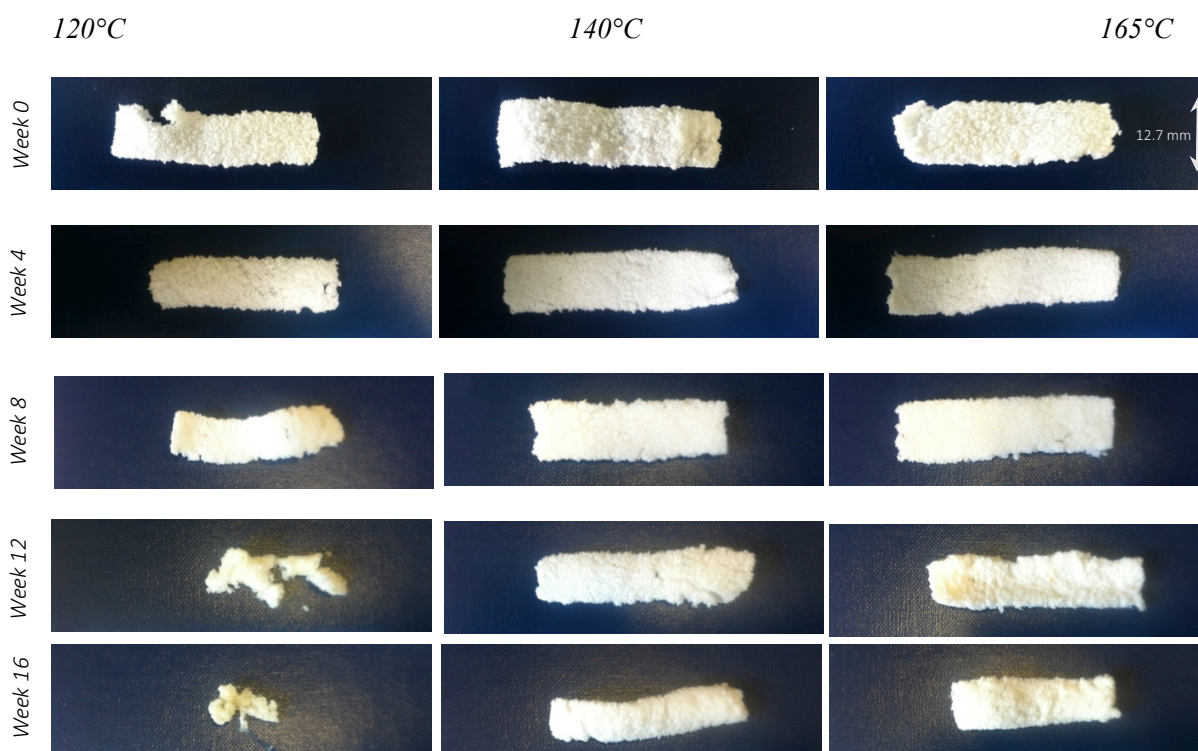

Figure S1. Macroscopic digital images of the porous PGS scaffolds cured at either (left) 120°C, (center) 140°C, or (right) 165°C before biodegradation began (week 0) and then at consequent time points of degradation in SBF: week 4, week 8, week 12, and week 16.
